# Supplementary material for: Effect of head/tail groups on molecular induced aggregation of polycationic cyclodextrin towards anionic surfactants
Source: Royal Society of Chemistry journal article supplement (doi:10.1039/c5ra28043e), 2016-01-01
Supplement: c5ra28043e1.pdf [file c5ra28043e1.pdf]

## Effect of Head/Tail Groups on Molecular Induced Aggregation of Polycationic Cyclodextrin Towards Anionic Surfactants

Rui-Juan Shi, Yong Chen, Xiao-Fang Hou, Yu Liu\*

### Synthesis route of hepta-imidazoliumyl- $\beta$ -cyclodextrin (**1**)

Per-6-deoxy-6-iodo- $\beta$ -cyclodextrin (**1'**) was prepared according to the literature procedure.<sup>1</sup>  $\beta$ -cyclodextrin (5.8 g, 5.1 mmol) was allowed to react in stirred anhydrous N,N-dimethylformamide (DMF, 80mL) containing triphenylphosphane (20 g, 76.5 mmol) and iodine (20 g, 79.0 mmol) under nitrogen atmosphere at 70°C for 18 h, and the solution was further treated with sodium methoxide (4.86 g, 90 mmol) for 1 h to destroy the formate esters formed in the reaction. Then the mixture was added into distilled water, filtrated and washed with menthol for 3 times to get **1'** as a white solid (8.36 g, 85%). <sup>1</sup>H NMR (400 MHz, [D<sub>6</sub>] DMSO): 3.24-3.31 (m, 7H), 3.34-3.48 (m, 14H), 3.55-3.68 (m, 14H), 3.74-3.86 (d, 7H), 4.93-5.03 (d, 7H), 5.88-5.97 (d, 7H), 6.00-6.11(d, 7H).

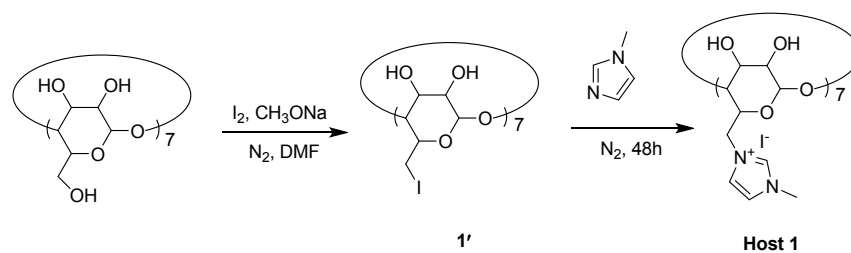

Scheme S1. Synthesis route of hepta-imidazoliumyl- $\beta$ -cyclodextrin (**1**).

**1** was prepared according to the literature procedure as well.<sup>2</sup> **1'** (500 mg, 0.26 mmol) was dissolved in 1-methylimidazole (3.0 mL, 45.0 mmol), and the reaction mixture was stirred at 80 °C under argon atmosphere for 48 h. The resultant solution was poured into acetone (100 mL). The precipitate formed was collected by filtration and then recrystallized from water to give a translucent flaky solid (355.2 mg, 55%). <sup>1</sup>H NMR (400MHz, D<sub>2</sub>O):  $\delta$  3.30-3.38 (t, J = 9.2 Hz, 1H), 3.50-3.56 (d, J = 9.9 Hz, 1H), 3.75-3.82 (s, 3H), 3.93-4.01 (t, J = 9.3 Hz, 1H), 4.08-4.17 (dd, J = 14.5, 5.6 Hz, 1H), 4.43-4.54 (m, 2H), 5.02-5.08 (s, 1H), 7.41-7.45 (s, 1H)

7.49-7.53 (s, 1H).  $^{13}\text{C}$  NMR (100MHz,  $\text{D}_2\text{O}$ ):  $\delta$  36.49, 50.05, 69.20, 71.52, 72.04, 81.98, 101.92, 123.38, 124.17, 137.46. HRMS (MALDAI, m/z)  $[\text{M}-2\text{I}]^{2+}/2$  1112.1223, found 1112.1244,  $[\text{M}-3\text{I}]^{3+}/3$  699.1134, found 699.1126,  $[\text{M}-4\text{I}]^{4+}/4$  492.6089, found 492.6081,  $[\text{M}-5\text{I}]^{5+}/5$  368.7062, found 368.7058,  $[\text{M}-7\text{I}]^{2+}/7$  227.1032, found 227.1032. Elemental Anal. Calcd. for **2**:  $\text{C}_{70}\text{H}_{105}\text{I}_7\text{N}_{14}\text{O}_{28}\cdot 8\text{H}_2\text{O}$ , C 32.05, H 4.65, N 7.48; Found C 32.29, H 4.92, N 7.27.

### Reference.

1. A. Gadelle, J. Defaye, *Angew. Chem. Int. Ed.*, 1991, **30**, 78–80.
2. D. Zhao, Y. Chen and Y. Liu, *Chin. Chem. Lett.*, 2015, **26**, 829-833.
